# Supplementary material for: In vivo inhibition of nuclear factor of activated T-cells leads to atherosclerotic plaque regression in IGF-II/LDLR–/–ApoB100/100 mice
Source: PubMed Central journal article supplement — Diab Vasc Dis Res. 2018 Mar 2;15(4):302–13. doi: 10.1177/1479164118759220 (PMC6039864; doi:10.1177/1479164118759220), 2018-03-02
Supplement: dvdres-sep-2017-00131-File004.pdf [file dvdres-sep-2017-00131-File004.pdf]

**Supplemental Table 1.** Metabolic parameters in old IGF-II/LDLR<sup>-/-</sup> ApoB<sup>100/100</sup> mice on HFD

|                               |         | Control       | A-285222     |
|-------------------------------|---------|---------------|--------------|
| <b>Glucose (mmol/L)</b>       |         |               |              |
| <i>Fasted</i>                 | Males   | 6.23 ± 0.38   | 6.93 ± 0.57  |
|                               | Females | 6.73 ± 0.93   | 6.44 ± 0.65  |
| <i>Fed</i>                    | Males   | 7.87 ± 0.65   | 9.63 ± 1.51  |
|                               | Females | 6.35 ± 0.42   | 6.99 ± 1.17  |
| <b>Insulin (µg/L)</b>         |         |               |              |
|                               | Males   | 0.671 ± 1.77  | 0.638 ± 0.26 |
|                               | Females | 0.494 ± 0.31  | 0.446 ± 0.17 |
| <b>Triglycerides (mmol/L)</b> |         |               |              |
|                               | Males   | 2.24 ± 1.61   | 1.41 ± 0.24  |
|                               | Females | 0.933 ± 0.063 | 1.88 ± 1.77  |
| <b>Cholesterol (mmol/L)</b>   |         |               |              |
|                               | Males   | 27.7 ± 7.41   | 31.0 ± 19.9  |
|                               | Females | 21.6 ± 3.25   | 23.2 ± 8.33  |
| <b>OPN (ng/mL)</b>            |         |               |              |
|                               | Males   | 222 ± 70.3    | 209 ± 38.9   |
|                               | Females | 185 ± 42.0    | 234 ± 101    |
| <b>Body weight (g)</b>        |         |               |              |
|                               | Males   | 41.3 ± 4.0    | 36.4 ± 3.2   |
|                               | Females | 28.2 ± 4.5    | 27.4 ± 5.4   |

Blood glucose was monitored at week 7 (fed conditions) and at week 8 (fasted conditions) of the experimental protocol. Insulin, triglycerides, total plasma cholesterol and OPN were measured at the termination of the experiment (all fasted conditions), after four weeks treatment with A-285222 (0.29 mg/kg body weight). Values are expressed as mean ± SD (n=3 males/group; n=4-7 females/group).
